# Supplementary material for: Incomplete amorphous phosphorization on the surface of crystalline cobalt molybdate to accelerate hydrogen evolution
Source: Royal Society of Chemistry journal article supplement (doi:10.1039/d1ta05352c), 2021-01-01
Supplement: d1ta05352c1.pdf [file d1ta05352c1.pdf]

Electronic Supplementary Information

**Incomplete amorphous phosphorization on the surface of crystalline cobalt molybdate to accelerate hydrogen evolution**

Jin Qian,<sup>ab</sup> Shanlin Li,<sup>b</sup> Qian Liu,<sup>b</sup> Ruguang Ma,<sup>\*bc</sup> Shengjuan Li,<sup>\*a</sup> and Jiacheng Wang<sup>\* bd</sup>

<sup>a</sup> School of Materials Science and Engineering, University of Shanghai for Science and Technology, 516 Jungong Road, Shanghai 200093, P. R. China

<sup>b</sup> State Key Laboratory of High Performance Ceramics and Superfine Microstructure, Shanghai Institute of Ceramics, Chinese Academy of Sciences, 1295 Dingxi Road, Shanghai 200050, P. R. China

<sup>c</sup> School of Materials Science and Engineering, Suzhou University of Science and Technology, 99 Xuefu Road Suzhou, 215011, China.

<sup>d</sup> University of Chinese Academy of Sciences, 19A Yuquan Rd, Shijingshan District, 100049 Beijing, P. R. China

Corresponding authors.

E-mail addresses: maruguang@mail.sic.ac.cn (R. Ma); usstshenli@usst.edu.cn (S. Li); jiacheng.wang@mail.sic.ac.cn (J. Wang).

### Synthesis of single-phase cobalt phosphide (CoP<sub>x</sub>) on nickel foam (NF)

The cobalt carbonate hydroxide (CoCH) precursor was synthesized by using a method reported by Huang et al.<sup>[1]</sup> Firstly, 2 mmol Co(NO<sub>3</sub>)<sub>2</sub>·6H<sub>2</sub>O and 10 mmol urea were dissolved in 35 mL of deionized water, and stirred violently for 0.5 h. And then, the above pink solution was transferred into a Teflon lined stainless-steel autoclave with 50 mL capacity, where a piece of pretreated Ni foam (2×3 cm<sup>2</sup>) was immersed and allowed to stand against the wall, After wards, the autoclave was sealed and maintained at 120 °C for 6h and left to cool down to room temperature naturally. Finally, the CoCH precursor was washed with deionized water and absolute ethanol several times and finally dried at 60 °C for overnight. To obtain the single-phase CoP<sub>x</sub>, the as-prepared precursor was annealed in Ar atmosphere in the presence of NaH<sub>2</sub>PO<sub>2</sub>·H<sub>2</sub>O (0.3 g) as the phosphorus source at 300 °C with the ramping rate of 2 °C·min<sup>-1</sup> and kept for 2 h.

### Preparation of Pt/C on NF

40 wt.% Pt/C (5 mg) was dispersed into 2 mL mixed solution containing 0.48 mL water, 0.02 mL 5% Nafion solution, and 0.5 mL ethanol. The solution was then ultrasonically treated for 30 minutes to form a uniform catalyst ink (2.5 mg·mL<sup>-1</sup>). Then, 0.05 mL catalyst ink was loaded on the NF electrode with the surface area of 1.0 cm<sup>2</sup> for four times, and dried at room temperature for 24 h. Consequently, the loading mass of Pt/C was around 0.5 mg·cm<sup>-2</sup>.

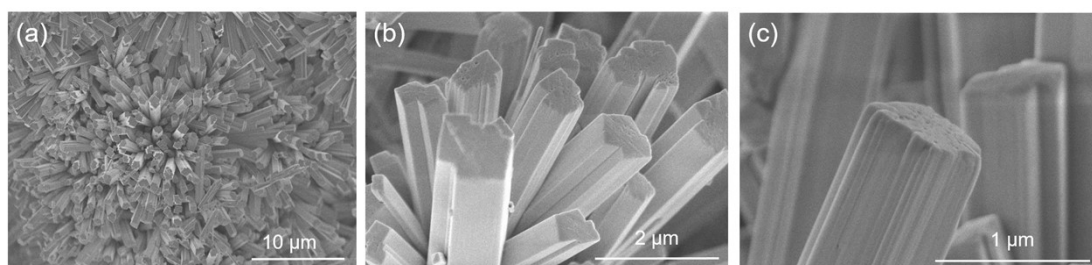

**Fig. S1** Low and high-magnifications SEM images of CoMoO<sub>4</sub>.

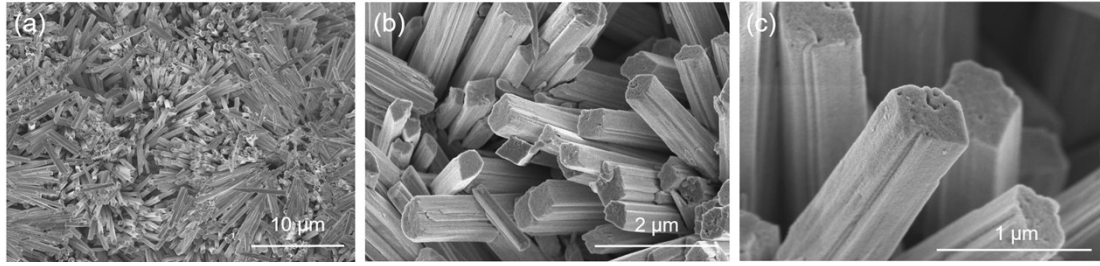

**Fig. S2** Low and high-magnifications SEM images of  $\text{CoMoO}_4@a\text{-CoP}_x$ .

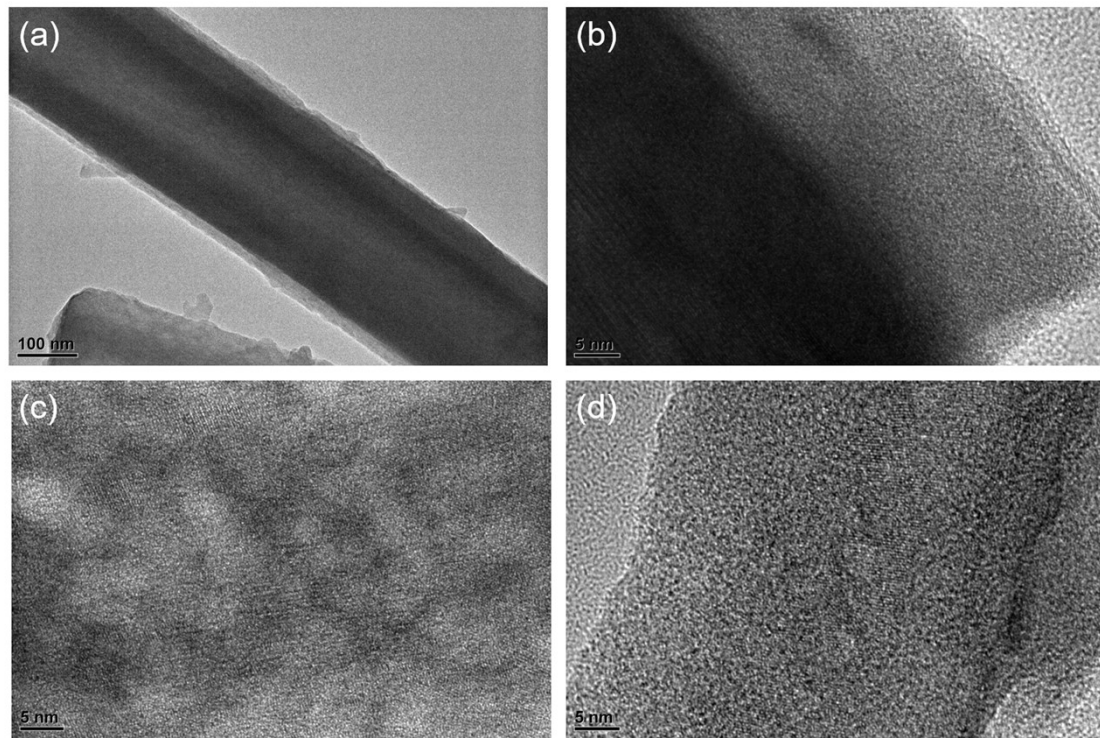

**Fig. S3** Low and high-magnifications TEM images of  $\text{CoMoO}_4@a\text{-CoP}_x$ .

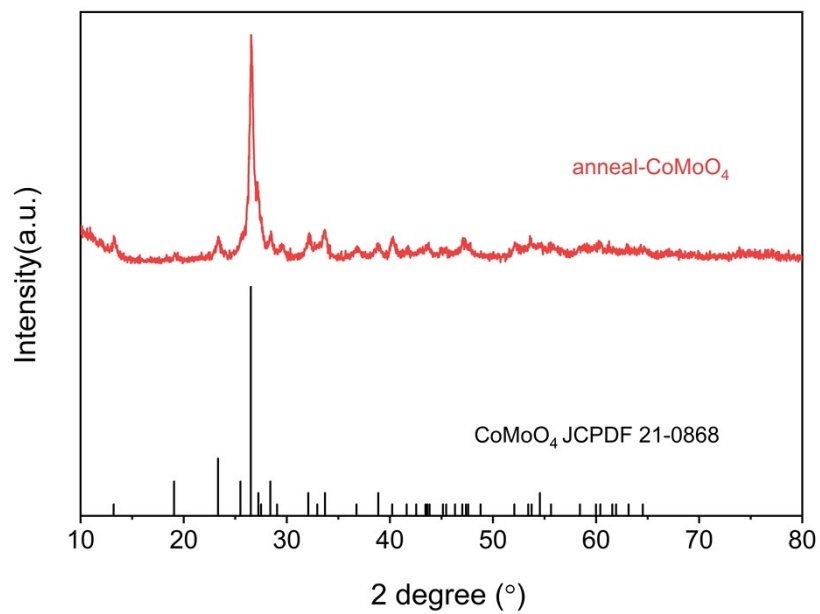

**Fig. S4** XRD pattern of CoMoO<sub>4</sub> annealed at 300°C.

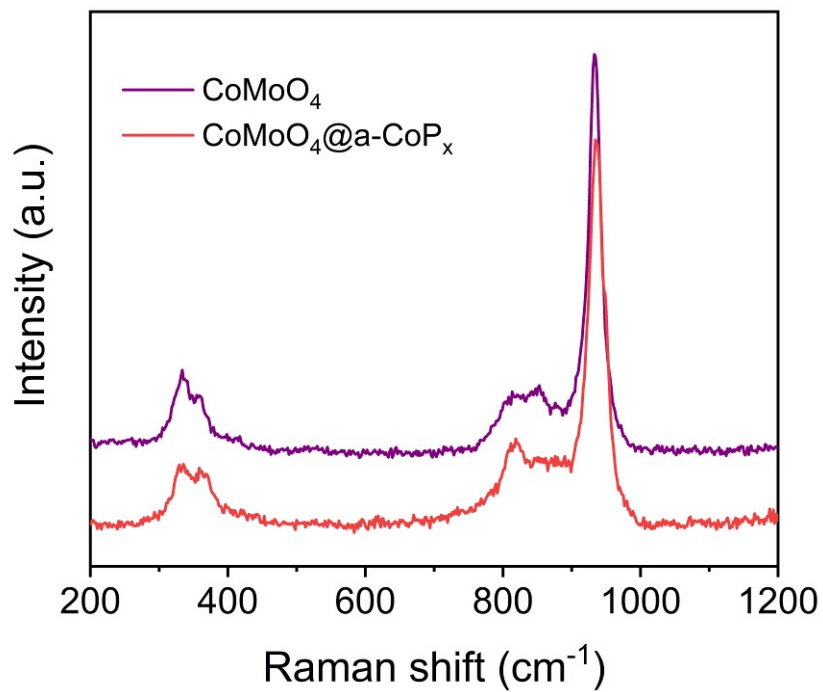

**Fig. S5** Raman spectra of CoMoO<sub>4</sub> and CoMoO<sub>4</sub>@a-CoP<sub>x</sub> samples

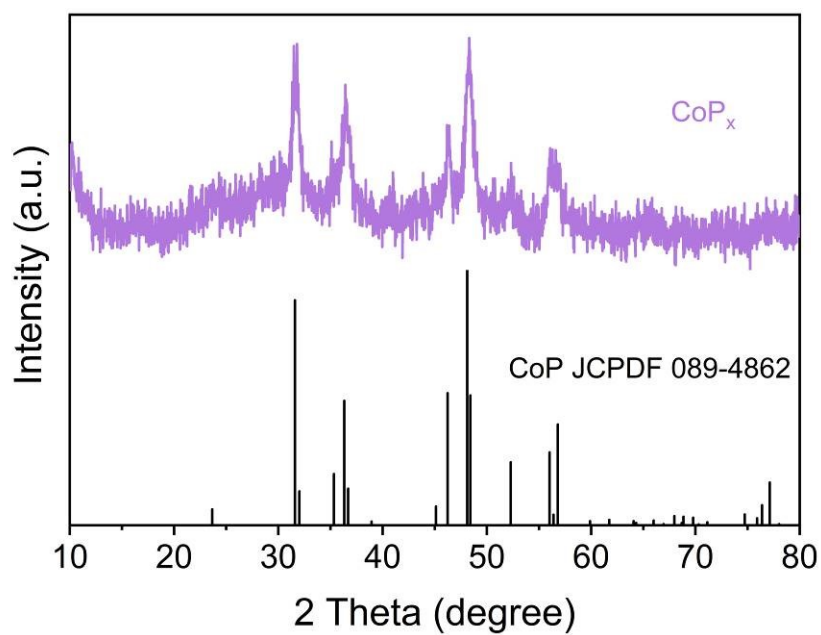

**Fig. S6** XRD pattern of  $\text{CoP}_x$  material.

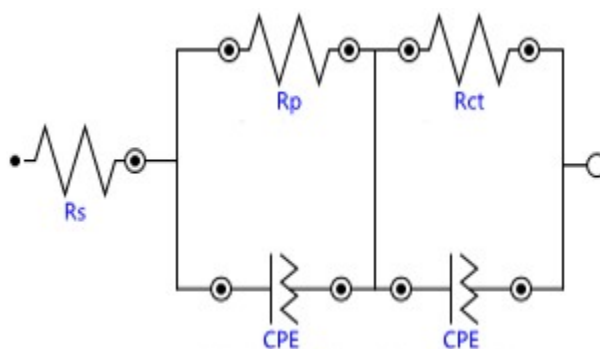

**Fig. S7** Equivalent electrical circuit used to model the HER kinetics process.  $R_s$  is the solution resistance, CPE (on the left) and  $R_p$  are the element and resistance describing electron transport at catalyst interface, respectively. CPE (on the right) is the element of the catalyst/electrolyte interface, and  $R_{ct}$  is the charge transfer resistance at catalyst/electrolyte interface.<sup>[2]</sup>

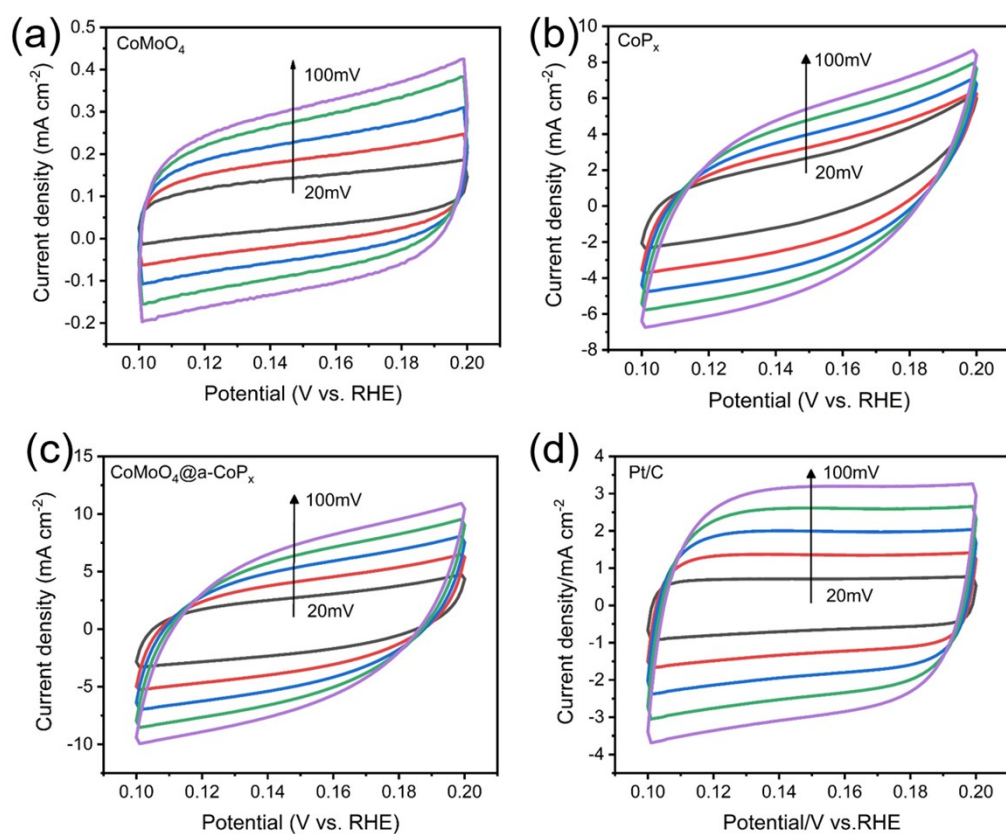

**Fig. S8** Cyclic voltammograms curves of CoMoO<sub>4</sub> (a), a-CoP<sub>x</sub> (b), CoMoO<sub>4</sub>@a-CoP<sub>x</sub> (c), and Pt/C (d).

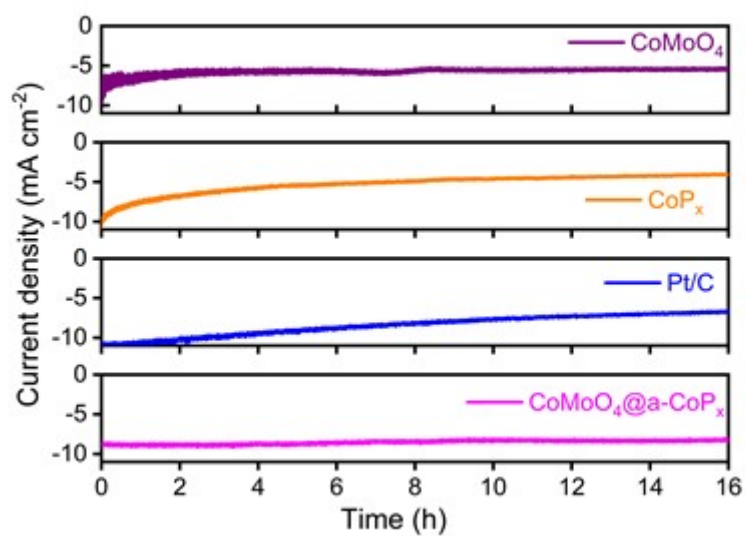

**Fig. S9** Durability tests of CoMoO<sub>4</sub>, CoP<sub>x</sub>, CoMoO<sub>4</sub>@a-CoP<sub>x</sub>, and Pt/C.

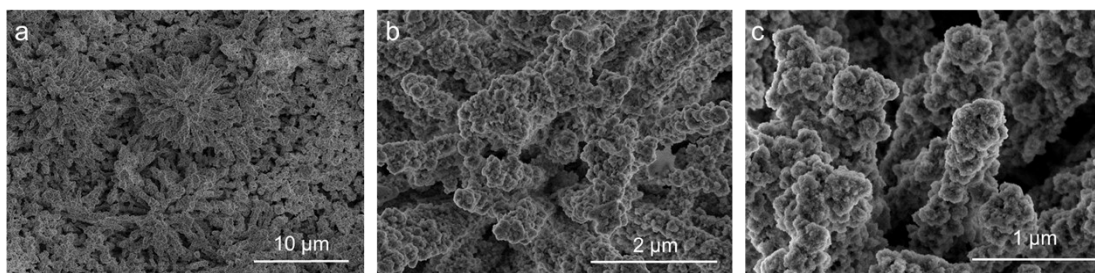

**Fig. S10** (a-c) SEM images of  $\text{CoMoO}_4@a\text{-CoP}_x$  after the stability test.

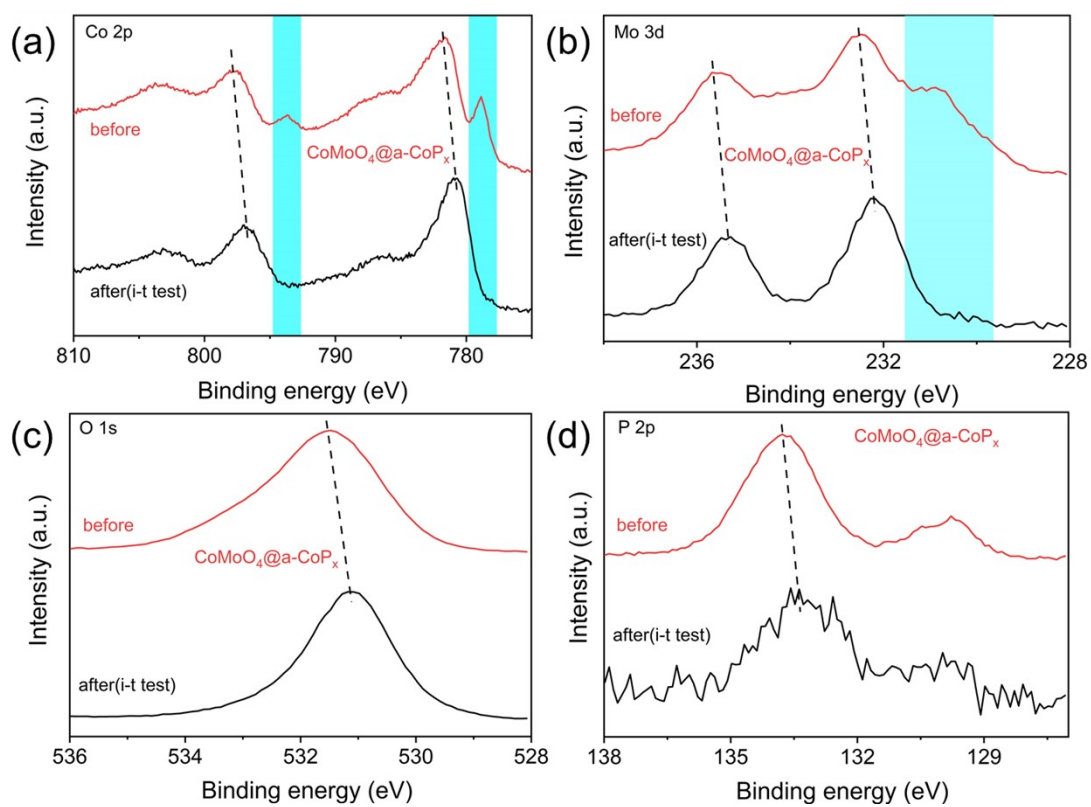

**Fig. S11** (a) Co 2p, (b) Mo 3d, (c) O 1s and (d) P 2p XPS spectra of  $\text{CoMoO}_4@a\text{-CoP}_x$  samples before and after the stability test.

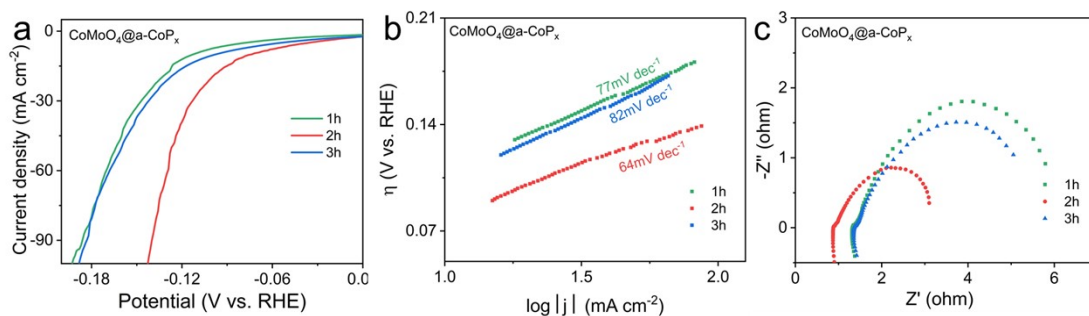

**Fig. S12** (a) The HER iR-corrected polarization curves of CoMoO<sub>4</sub> with difference of the phosphating time at 300 °C as a scan rate of 2 mV • s<sup>-1</sup> in 1 M KOH. (b) The corresponding Tafel plots. (c) Nyquist plots of the catalysts obtained at a potential of -0.1 V vs. RHE.

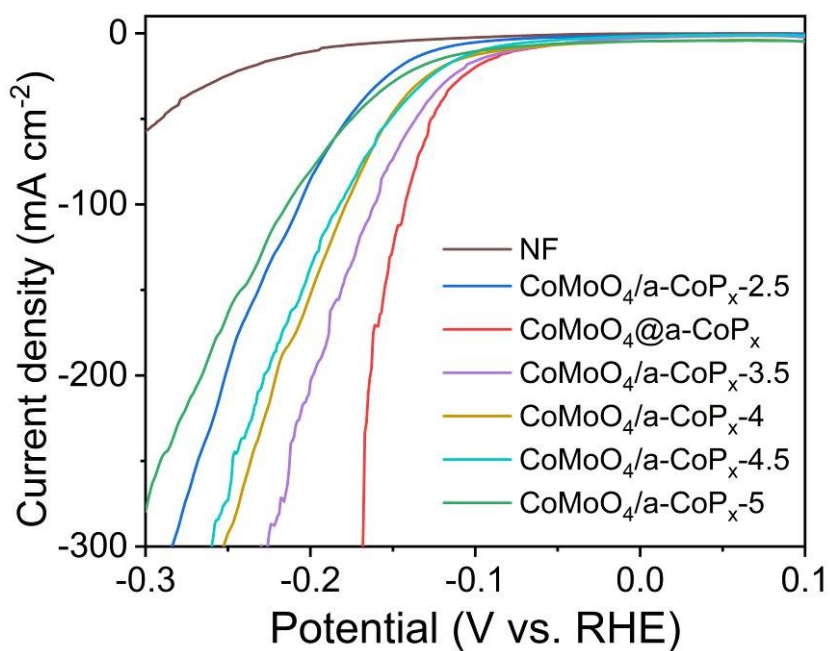

**Fig. S13** The HER iR-corrected polarization curves of CoMoO<sub>4</sub> with different phosphating temperature in 1 M KOH.



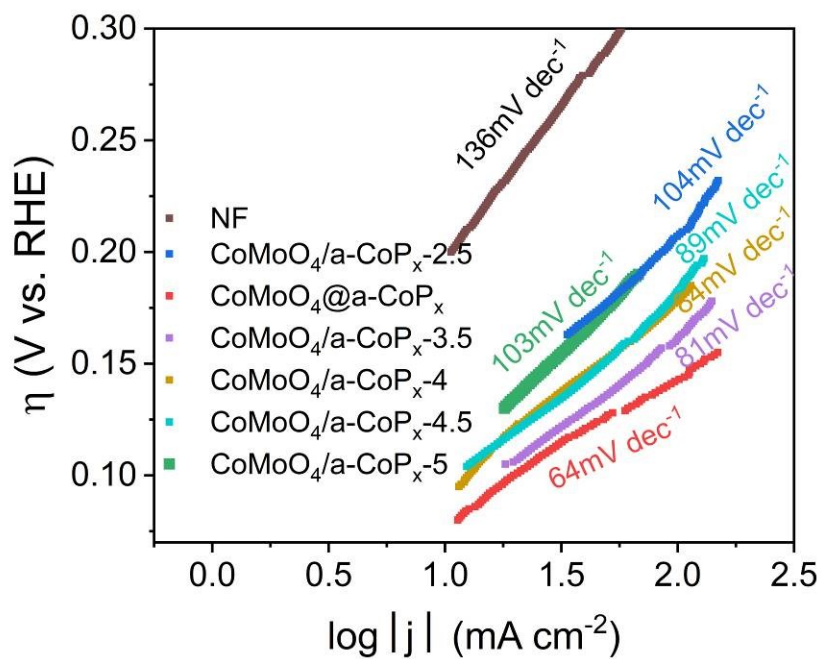

**Fig. S14** Corresponding Tafel plots derived from Fig. S13.

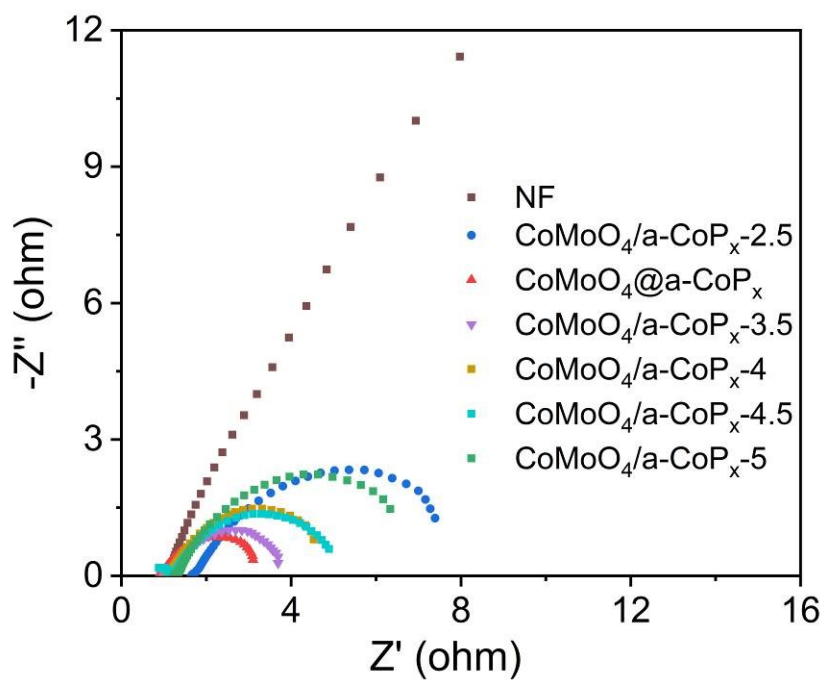

**Fig. S15** EIS plots of CoMoO<sub>4</sub>/a-CoP<sub>x</sub>-x (x=2.5, 3, 3.5, 4, 4.5 and 5) with different phosphating temperature.

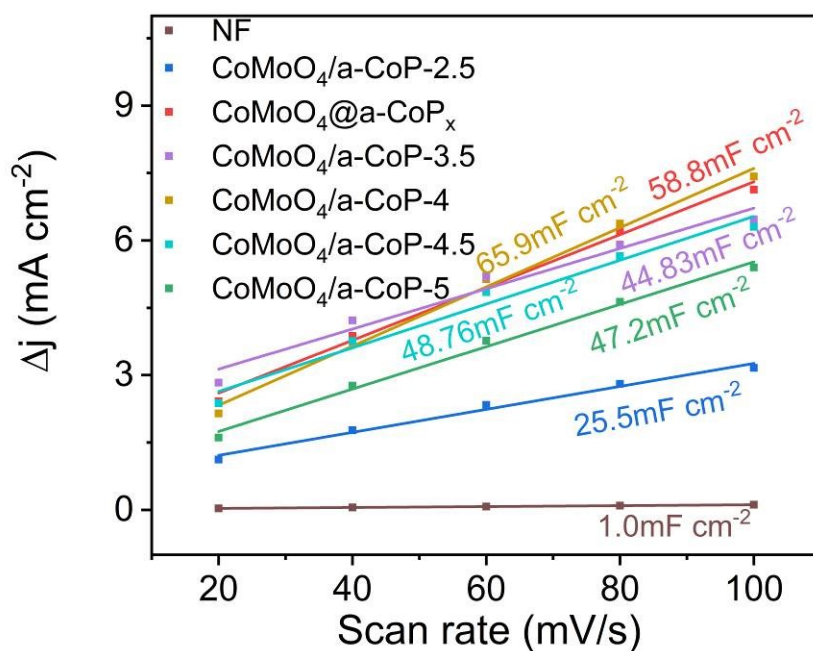

**Fig. S16** The capacitive currents at 0.15 V vs. RHE as a function of scan rate for the corresponding catalysts in 1 M KOH solution.

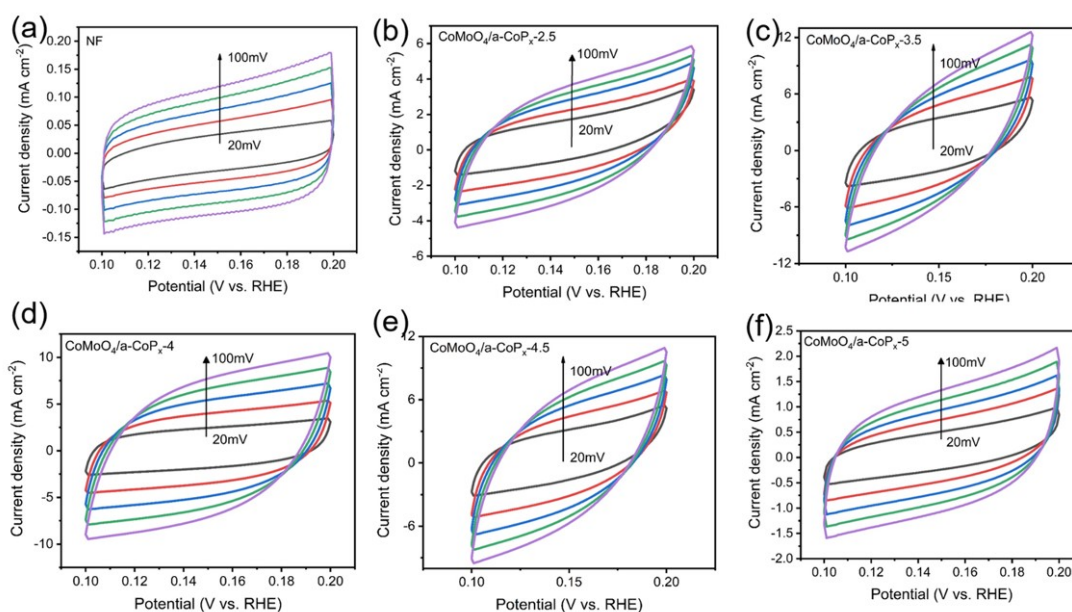

**Fig. S17** Cyclic voltammograms curves of NF (a); CoMoO<sub>4</sub> electrodes after phosphating treatment at (b) 250 °C, (c) 350 °C, (d) 400 °C, (e) 450 °C and (f) 500 °C for 2h in region of 0.1~0.2 V vs. RHE at various scan rate. (f) The capacitive currents at 0.15 V vs RHE as a function of scan rate for the corresponding catalysts (1 M KOH solution).

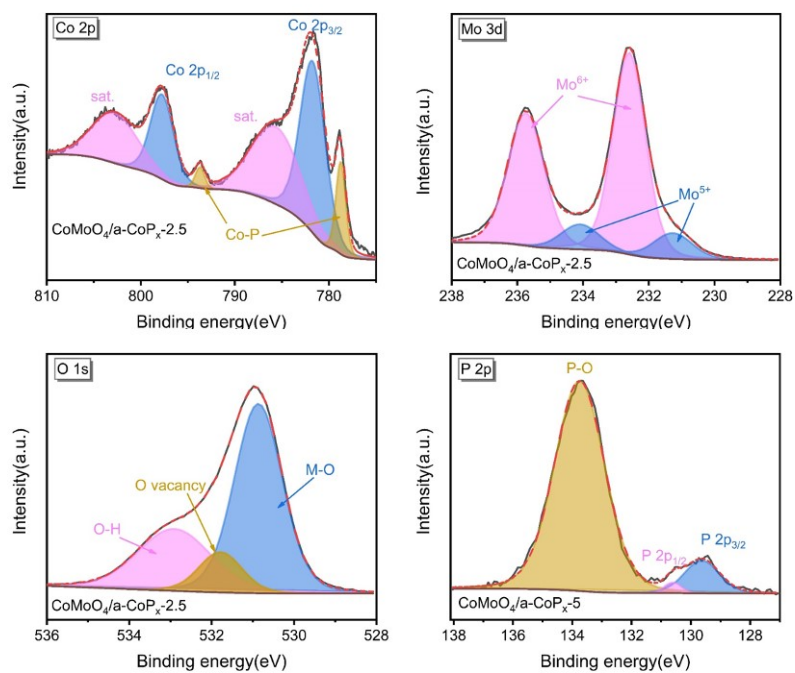

**Fig. S18** XPS spectra [Co 2p, Mo 3d, O 1s, P 2p] of CoMoO<sub>4</sub>/a-CoP<sub>x-2.5</sub>.

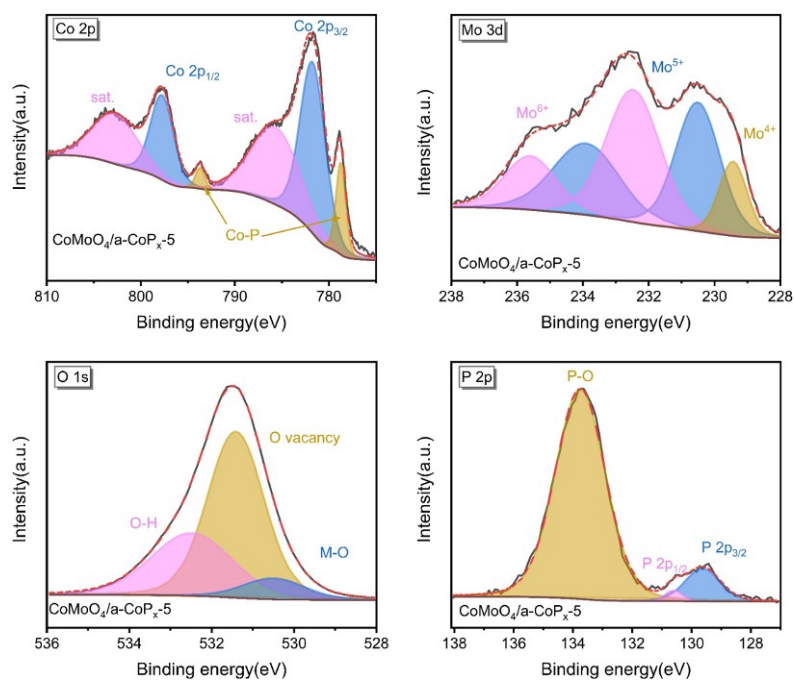

**Fig. S19** XPS spectra [Co 2p, Mo 3d, O 1s, P 2p] of CoMoO<sub>4</sub>/a-CoP<sub>x-5</sub>.

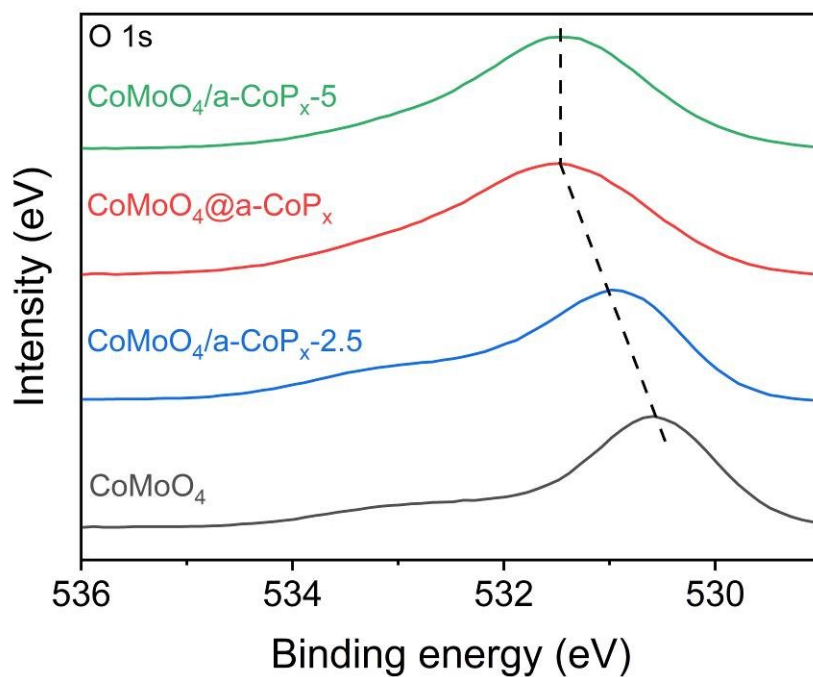

**Fig. S20** XPS spectra O 1s of  $\text{CoMoO}_4$ ,  $\text{CoMoO}_4/\text{a-CoP}_x\text{-2.5}$ ,  $\text{CoMoO}_4@\text{a-CoP}_x$  and  $\text{CoMoO}_4/\text{a-CoP}_x\text{-5}$ .

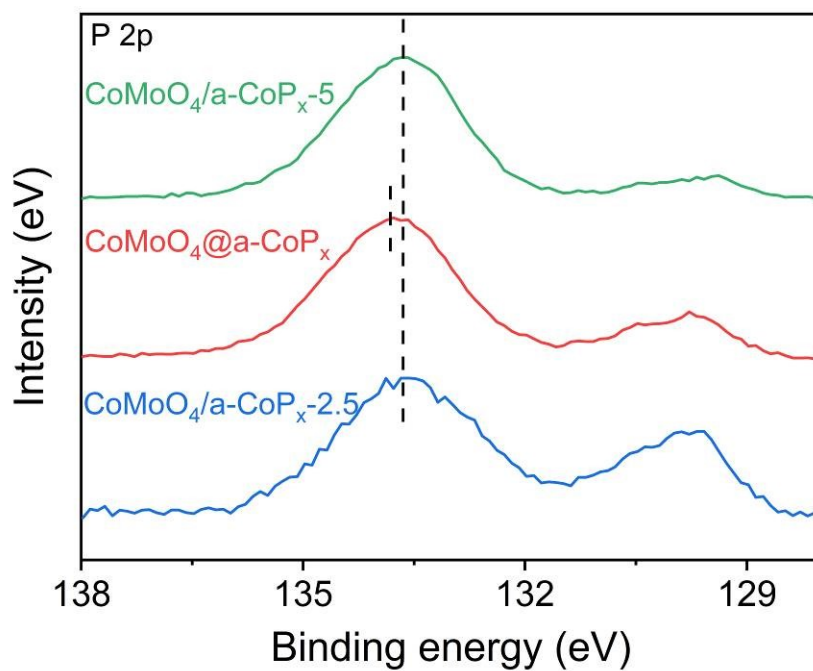

**Fig. S21** XPS spectra P 2p of  $\text{CoMoO}_4/\text{a-CoP}_x\text{-2.5}$ ,  $\text{CoMoO}_4@\text{a-CoP}_x$  and  $\text{CoMoO}_4/\text{a-CoP}_x\text{-5}$ .

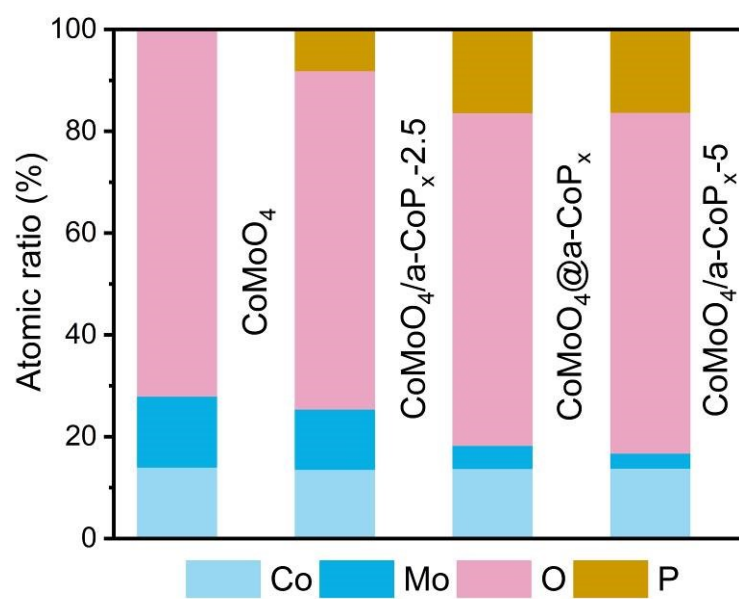

**Fig. S22** Content diagram of elements in XPS before and after phosphating.

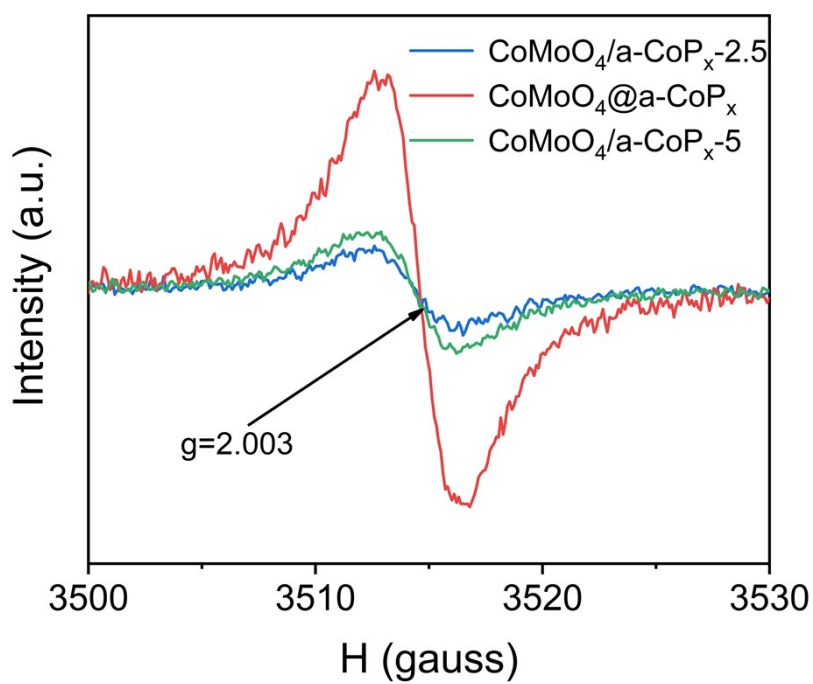

**Fig. S23** EPR of CoMoO<sub>4</sub>/a-CoP<sub>x</sub>-2.5, CoMoO<sub>4</sub>@a-CoP<sub>x</sub> and CoMoO<sub>4</sub>/a-CoP<sub>x</sub>-5 samples.

**Table S1** Activity comparison of CoMoO<sub>4</sub>@a-CoP<sub>x</sub> materials with other highly efficient transition metal-based catalysts at 1 M KOH for HER.

| Catalysts                                                  | Overpotential(mV)      |                         | Tafel slope (mV/dec) | Reference |
|------------------------------------------------------------|------------------------|-------------------------|----------------------|-----------|
|                                                            | j=10mA/cm <sup>2</sup> | j=100mA/cm <sup>2</sup> |                      |           |
| CoMoO <sub>4</sub> @a-CoP <sub>x</sub> /NF                 | 74.7                   | 144.3                   | 64                   | This work |
| Ni <sub>2</sub> P–Ni <sub>12</sub> P <sub>5</sub> /NF      | 76                     | 147                     | 68                   | [3]       |
| Mo-CoP/NC/TF                                               | 78                     |                         | 48.1                 | [4]       |
| CoP/NPC/TF                                                 | 80                     |                         | 50                   | [5]       |
| CMP-350                                                    | 94                     | 197                     | 93                   | [6]       |
| Ni-doped FeP/C                                             | 95                     |                         | 72                   | [7]       |
| N-NiMoO <sub>4</sub> /NiS <sub>2</sub>                     | 99                     | -                       | 74.2                 | [8]       |
| Ni-SA/NC                                                   | 102                    |                         | 120                  | [9]       |
| S-Doped MoP                                                | 104                    |                         | 56                   | [10]      |
| CoP/CN/Ni                                                  | 106                    | -                       | 64.6                 | [11]      |
| CoP <sub>3</sub> /CoMoP-5/NF                               | 110                    | -                       | 64.1                 | [12]      |
| CoP/NCNHP                                                  | 115                    |                         | 66                   | [13]      |
| NiCo <sub>2</sub> O <sub>4</sub> @CoMoO <sub>4</sub> /NF-7 | 121                    |                         | 77                   | [14]      |
| CoP NFs                                                    | 136                    | -                       | 56.2                 | [15]      |
| H-Fe-CoMoS                                                 | 137                    | -                       | 98                   | [16]      |
| Amorphous CoP                                              | 143                    | -                       | 63                   | [17]      |
| CoP/NCNT-CP                                                | 165                    |                         | 96                   | [18]      |
| CoP <sub>x</sub> @CNS                                      | 171                    | -                       | 129                  | [19]      |
| CoP/Ni <sub>2</sub> P                                      | 200                    | -                       | 103                  | [20]      |
| CNP-2                                                      | 200                    |                         | 103                  | [21]      |
| Co <sub>2</sub> P/CoNPC                                    | 208                    | -                       | 83.9                 | [22]      |

**Table S2** EIS data of CoMoO<sub>4</sub>, a-CoP<sub>x</sub>, CoMoO<sub>4</sub>@a-CoP<sub>x</sub> and Pt/C in HER tests.

| Samples                                | R <sub>s</sub> (Ω) | R <sub>ct</sub> (Ω) |
|----------------------------------------|--------------------|---------------------|
| CoMoO <sub>4</sub>                     | 1.240              | 29.00               |
| CoP <sub>x</sub>                       | 1.410              | 3.48                |
| CoMoO <sub>4</sub> @a-CoP <sub>x</sub> | 0.883              | 2.46                |
| Pt/C                                   | 0.573              | 0.71                |

**Table S3** Double layer capacitance ( $C_{dl}$ ), calculated ECSA of the prepared materials over NF ( $C_s$  value is  $1.7 \text{ mF cm}^{-2}$ ).

| Samples                                      | $C_{dl}$ (mF) | ECSA ( $\text{cm}^2$ ) |
|----------------------------------------------|---------------|------------------------|
| CoMoO <sub>4</sub>                           | 2.0           | 1.2                    |
| a-CoP <sub>x</sub>                           | 40.7          | 23.9                   |
| CoMoO <sub>4</sub> / a-CoP <sub>x</sub> -2.5 | 25.5          | 15.0                   |
| CoMoO <sub>4</sub> @a-CoP <sub>x</sub>       | 58.8          | 34.6                   |
| CoMoO <sub>4</sub> / a-CoP <sub>x</sub> -3.5 | 44.8          | 26.3                   |
| CoMoO <sub>4</sub> / a-CoP <sub>x</sub> -4   | 65.9          | 38.6                   |
| CoMoO <sub>4</sub> / a-CoP <sub>x</sub> -4.5 | 48.7          | 28.6                   |
| CoMoO <sub>4</sub> / a-CoP <sub>x</sub> -5   | 47.2          | 27.7                   |
| Pt/C                                         | 29.9          | 17.6                   |

**Table S4** Elemental quantification results of CoMoO<sub>4</sub>, CoMoO<sub>4</sub>/a-CoP<sub>x</sub>-2.5, CoMoO<sub>4</sub>@a-CoP<sub>x</sub> and CoMoO<sub>4</sub>/a-CoP<sub>x</sub>-5 through XPS analysis.

| Atomic (%)                                  | Co    | Mo    | O     | P     |
|---------------------------------------------|-------|-------|-------|-------|
| Samples                                     |       |       |       |       |
| CoMoO <sub>4</sub>                          | 14.06 | 13.95 | 71.99 | --    |
| CoMoO <sub>4</sub> /a-CoP <sub>x</sub> -2.5 | 13.64 | 11.82 | 66.47 | 8.07  |
| CoMoO <sub>4</sub> @a-CoP <sub>x</sub>      | 13.8  | 4.53  | 65.35 | 16.32 |
| CoMoO <sub>4</sub> /a-CoP <sub>x</sub> -5   | 13.86 | 2.95  | 66.96 | 16.23 |

--" indicate there is no this element in sample.

## References:

- [1] X. Huang, X. Xu, X. Luan, and D. Cheng, *Nano Energy*, 2019, **68**, 104332.
- [2] Y. Lin, K. Sun, S. Liu, X. Chen, Y. Cheng, W. Cheong, Z. Chen, L. Zheng, J. Zhang, X. Li, *Adv. Energy Mater.*, 2019, **9**, 1901213.
- [3] Z. Wang, S. Wang, L. Ma, Y. Guo, and R. Jiang, *Small*, 2021, **17**, 2006770.
- [4] B. Yla, Z. C. Bao, B. Ww, A. Xs, Z. A. Jin, W. A. Rui, A. Bh, W. D. Qiang, C. Jj, A. Yg, *Chem. Eng. J.*, 2020, **405**, 126981.
- [5] X. Huang, X. Xu, C. Li, D. Wu, D. Cheng, and D. Cao, *Adv. Energy Mater.*, 2019, **9**, 1803970.
- [6] S. Zhao, J. Berry-Gair, W. Li, G. Guan, and I. P. Parkin, *Adv. Sci.*, 2020, **7**, 190374.
- [7] X. F. Lu, L. Yu, and X. W. D. Lou, *Science Adv.*, 2019, **5**, 6009.
- [8] L. An, J. Feng, Y. Zhang, R. Wang, H. Liu, G. C. Wang, F. Cheng, P. Xi, *Adv. Funct. Mater.* 2019, **29**, 1805298.
- [9] W. Zang, T. Sun, T. Yang, S. Xi, M. Waqar, Z. Kou, S. J. Pennycook, *Adv. Mater.*, 2021, **33**, 2003846.
- [10] K. Liang, S. Pakhira, Z. Yang, A. Nijamudheen, and Y. Yang, *ACS Catalysis*, 2018, **9**, 651-659.
- [11] C. Teng, B. Jm, A. Sc, B. Yw, A. Cd, A. Jc, B. Jh, A. Wd, *Chem. Eng. J.*, 2021, **415**, 129031.
- [12] D. Jiang, Y. Xu, R. Yang, D. Li, S. Meng, and M. Chen, *ACS Sustainable Chem. Eng.*, 2019, **7**, 9309-9317.
- [13] Y. Pan, K. Sun, S. Liu, X. Cao, K. Wu, W.C. Cheong, Z. Chen, Y. Wang, Y. Li, Y. Liu, *J. Am. Chem. Soc.*, 2018, **140**, 210-2618.
- [14] Y. Gong, Z. Yang, Y. Lin, J. Wang, H. Pan, Z. Xu, *J. Mater. Chem. A*, 2018, **6**, 16950-16958.
- [15] L. Ji, J. Wang, X. Teng, T. J. Meyer, Z. Chen, *ACS Catalysis*, 2019, **10**, 412-419.
- [16] Y. Guo, X. Zhou, J. Tang, S. Tanaka, and Y. Sugahara, *Nano Energy*, 2020, **75**, 104913.
- [17] M. Driess, R. B. Suito, and P. M. Menezes, *J. Mater. Chem. A*, 2019, **7**, 15749-15756.
- [18] L. Wang, J. Cao, X. Cheng, C. Lei, Q. Dai, B. Yang, Z. Li, M. A. Younis, L. Lei, Y. Hou, *ACS Sustainable Chem. Eng.*, 2019, **7**, 10044-10051.
- [19] C. Hou, L. Zou, Y. Wang, and Q. Xu, *Angew. Chem., Int. Ed.*, 2020, **132**, 21544-21550.
- [20] J. Zhang, S. Wei, Y. Liu, G. Wang, Y. Cui, A. Dong, S. Xu, J. Lian, Q. Jiang, *J. Mater. Chem. A*, 2019, **7**, 26177-26186.
- [21] Y. Gong, Z. Yang, Y. Lin, J. Wang, H. Pan, Z. Xu, *J. Mater. Chem. A*, 2018, **6**, 16950-16958.
- [22] H. Liu, J. Guan, S. Yang, Y. Yu, and Q. Xu, *Adv. Mater.*, 2020, **32**, 2003469.
